# Supplementary material for: MYC Regulates PHF8, Which Promotes the Progression of Gastric Cancer by Suppressing miR-22-3p
Source: PubMed Central journal article supplement — Technol Cancer Res Treat. 2020 Oct 28;19:1533033820967472. doi: 10.1177/1533033820967472 (PMC7607725; doi:10.1177/1533033820967472), 2020-10-28
Supplement: sumplementary_materials.pdf [file sumplementary_materials.pdf]

Table S1 qRT-PCR primers

| Gene       | Sense primer (5'—3')      | Anti-sense primer (5'—3') |
|------------|---------------------------|---------------------------|
| PHF8       | ACACAGCGTAGATGCGAGCA      | GCTGAGTATCAGCACGACGT      |
| MYC        | GCTTGACATGACAAGCTTCTCA    | TTAGCCTGAGCTATCGACTG      |
| β -actin   | GTCTCCTCTGACTTCAACAGCG    | ACCACCCTGTTGCTGTAGCCAA    |
| miR-22-3p  | GTCTGCTCCACGAGCTAGACGG    | ATTCCACTTCGGAGAGGGC       |
| miR-494-3p | AGTAACCTGGAGCTCCATAAGCGT  | GCGATCCTAGGTAAGCGACGT     |
| miR-31-5p  | TCGATAATCGCGTAGCCAAGTCAT  | TAATTCCGGTCAGGCTAAG       |
| miR-182-5p | TTGCCCTGGACTCAGCTCCATCG   | TTGACCCTACAGACCTAC        |
| miR-495-3p | GGCTTAGCGTCAGTCAGTCGTAGCT | TCGATCCGATCCGATAATCGA     |
| U6         | CACAGCTCAAGGAGCCCA        | TGGCTCTCCATAGTTCCAT       |

Table S2 The potential binding sites of microRNAs on PHF8 3' UTR by using starBase.

| MiRNAs         | BindingSites              | Alignment                                                                                                                                                                            |
|----------------|---------------------------|--------------------------------------------------------------------------------------------------------------------------------------------------------------------------------------|
| hsa-miR-22-3p  | chrX:53963744-53963765[-] | Target: 5' cuuGAUCUUUCAAGGCAGCUa 3'<br><br>miRNA : 3' uguCAAGAAGUUGACCGUCGAa 5'                  |
| hsa-miR-494-3p | chrX:53963512-53963540[-] | Target: 5' uuuGUUUUUU-UUAAUGUUUCa 3'<br><br>miRNA : 3' cucCAAAGGGCACAUAACAAAGu 5'                |
| hsa-miR-31-5p  | chrX:53965056-53965084[-] | Target: 5' guCUCUGCC- -CCCUCUUGCCa 3'<br><br>miRNA : 3' ucGAUACGGUCGUAGAACGGa 5'                 |
| hsa-miR-182-5p | chrX:53965054-53965082[-] | Target: 5' gcUGUGGUCUCUGCCCCUCUUGCCAAa 3'<br><br>miRNA : 3' ucACACUCAAGAUGG-- --- --UAACGGUUu 5' |
| miR-495-3p     | chrX:53963607-53963635[-] | Target: 5' ucuuAGAGCCCCUGUUUGUUg 3'<br><br>miRNA : 3' uucuUCACGUGGUACAAACAAa 5'                  |
